# Supplementary material for: Pd–Cu dual-site tuned H adsorption for efficient electrocatalytic hydrogenation of HMF
Source: Royal Society of Chemistry journal article supplement (doi:10.1039/d5sc06257h), 2025-12-20
Supplement: d5sc06257h1.pdf [file d5sc06257h1.pdf]

# Supplementary Information

Pd-Cu Dual Sites Turning H Adsorption for Efficient Electrocatalytic

Hydrogenation of HMF

## Materials and methods

### 1. Materials

$\text{Cu}(\text{NO}_3)_2 \cdot 3\text{H}_2\text{O}$  (99 %),  $\text{PdCl}_2$  (98 %),  $\text{NaCl}$  (99 %),  $\text{C}_6\text{H}_{12}\text{O}_6$  (95 %), and  $\text{KHCO}_3$  (99.5 %) were purchased from Aladdin. Purified water ( $\rho > 18 \text{ M}\Omega \text{ cm}$ ) was produced in the laboratory.

### 2. Synthesis of Pd/Cu@3DC catalysts

First, 18.3 g of  $\text{NaCl}$ , 0.469 g of glucose,  $\text{Cu}(\text{NO}_3)_2 \cdot 3\text{H}_2\text{O}$  and  $\text{PdCl}_2$  in different ratios ( $n_{\text{Cu}}:n_{\text{Pd}} = 99:1, 97:3, 95:5$ ) were dissolved in 60 mL of purified water with stirring. The solution was then freeze-dried at  $-20^\circ\text{C}$  for 20 h. The yellow-green powder obtained was calcined at  $700^\circ\text{C}$  in an  $\text{H}_2/\text{Ar}$  atmosphere for 2 h at a ramp rate of  $10^\circ\text{C}/\text{min}$ . The resulting product was washed three times with purified water to remove  $\text{NaCl}$  and dried overnight to obtain the Pd/Cu@3DC catalyst.

### 3. Material characterization

Scanning electron microscopy (SEM) measurements were performed using a Hitachi S4800 at 15 kV. Transmission electron microscopy (TEM), energy dispersive X-ray spectroscopy (EDS) and scanning transmission electron microscopy measurements were carried out using a JEM-F200 equipped with an EDS detector (at 200 kV) to analyze the microstructure of the samples. X-ray diffraction (XRD) patterns were obtained using a Bruker D8 with  $\text{Cu K}\alpha$  radiation, operated at 40 mA and 40 kV. X-ray photoelectron spectroscopy (XPS) was performed using an ESCALAB 250Xi with a standard  $\text{Al K}\alpha$  X-ray source, standard lens pattern, and an analyzer passing energy at 20 eV.

### 4. Electrochemical measurements

5 mg electrocatalyst was dispersed in 950  $\mu\text{L}$  of anhydrous ethanol and 50  $\mu\text{L}$  of 5 wt% Nafion solution by sonication for 30 min, and then the ink was dripped onto a 3 mm diameter L-shaped glassy carbon electrode with a loading of  $0.42 \text{ mg cm}^{-2}$ . All electrochemical tests were carried out at room temperature using a three-electrode setup on a CHI760E in an aqueous 0.5 M  $\text{KHCO}_3$  solution saturated with  $\text{N}_2$ . An H-type electrolytic cell was used with an  $\text{Ag}/\text{AgCl}$  electrode as the reference electrode and a graphite rod as the counter electrode. At first, the samples were reduced by galvanostatic at 10 Ma for 10 min. All linear sweep voltammetry (LSV) tests were

performed at a scan rate of 5 mV s<sup>-1</sup>. Electrochemical Impedance Spectroscopy (EIS) tests were performed over a frequency range from 10<sup>6</sup> to 0.05 Hz. For product testing, electrocatalyst ink was uniformly coated on carbon paper and used as the working electrode at constant current -0.90 V to -1.10 V (vs. Ag/AgCl) potentials. To evaluate the ECSA (electrochemically active surface area) in terms of the double-layer capacitance ( $C_{dl}$ ) using the equation  $ECSA = C_{dl}/C_s$ , where  $C_s$  refers to the surface bilayer capacitance of the ideal at electrode (40  $\mu\text{F cm}^{-2}$ ), and cyclic voltammogram (CV) curves were collected in the non-faradaic region (-0.2 V ~ -0.35 V vs. Ag/AgCl) at varied scan rates from 20 to 100 mV s<sup>-1</sup>.

PEM test: the catalyst ink was sprayed on the carbon paper with a loading of 1 mg cm<sup>-2</sup>. The proton exchange membrane (PEM)-based HMF hydrogenation electrolysis was performed on a single cell with serpentine flow fields (25 cm<sup>2</sup>). Titanium felt and carbon paper were taken as the anode and cathode, and Nafion 115 was used as the PEM. An aqueous 0.5 M KHCO<sub>3</sub> solution with or without 10 mM HMF flowed into the cathode or anode with a flow rate of 1 ml min<sup>-1</sup> respectively.

## 5. Product analysis.

The substrates and products were analyzed by high-performance liquid chromatography (HPLC). For HPLC sample preparation, 20  $\mu\text{L}$  of electrolyte was collected in a sample vial before and after electrolysis and diluted with 980  $\mu\text{L}$  of deionized water and filtered to obtain the HPLC sample. The HPLC is equipped with Ultimate XB-C18 column (4.6mm  $\times$  250mm ,5 $\mu\text{m}$ ) and a UV-visible detector. The detector's wavelength was set to 230 nm. The chromatographic column was operated at 45 °C with isocratic elution of water and acetonitrile, and the flow rate was set at 0.6 mL min<sup>-1</sup>, the ratio of water to acetonitrile was 85%:15%. HMF and BHMF eluted at around 8.8 min and 7.6 min, respectively, and 5-MF eluted at around 21.9 min.

HMF conversion (Conv.), product selectivity (Sel.), and FE were calculated by the following equations.

$$\text{Conv. (HMF) (\%)} = n(\text{HMF})_{\text{consumed}} / n(\text{HMF})_{\text{initial}} \times 100\% \quad (1)$$

$$\text{Sel. (\%)} = n(\text{BHMF})_{\text{formed}} / n(\text{HMF})_{\text{consumed}} \times 100\% \quad (2)$$

$$\text{FE (\%)} = n(\text{BHMF})_{\text{formed}} \times 2 \times F / Q_{\text{passed}} \times 100\% \quad (3)$$

where  $n$  is the molar amount of a component measured by HPLC,  $F$  is Faraday's constant ( $96485 \text{ C mol}^{-1}$ ), and  $Q$  is the charge recorded at the electrochemical workstation.

BHMF was extracted from the electrolyte with ethyl acetate three times and then removed the solvent using a rotary evaporator. The product was obtained after vacuuming dry.

#### 6. The pseudo-first-order kinetic test.

The pseudo-first-order kinetic pattern for the electrochemical hydrogenation of HMF can be calculated by using Equation (1):

$$\ln\left(\frac{C_0}{C}\right) = kt \quad (1)$$

Wherein,  $C$  is the HMF concentration at different time ( $t$ ) intervals ( $\text{mol}\cdot\text{L}^{-1}$ ), and  $C_0$  is the initial HMF concentration ( $\text{mol}\cdot\text{L}^{-1}$ ), and  $k$  is the apparent pseudo-first-order reaction rate constant ( $\text{min}^{-1}$ ), and  $t$  is the reaction time ( $\text{min}$ ).

#### 7. BHMF separation and polymerization

At the end of the reaction, the water in the electrolyte is removed in a rotary evaporator at a  $65^\circ\text{C}$ . The remaining solid was washed 5 times with ethyl acetate. Finally, the BHMF was recrystallized from the solution by removing the ethyl acetate.

Poly(2,5-furandimethylene succinate) (PFS) was synthesized via a modified method from a literature.<sup>1</sup> At first, BHF (1.5 g), SA (1.38 g), and N,N-dimethyl-4-aminopyridine (4.28 g) were dissolved in 20 mL anhydrous dichloroethane under  $\text{N}_2$  atmosphere. Then, N,N'-diisopropylcarbodiimide (4.43 g) was slowly dropped into the above solution. After stirring at room temperature for 24 h, the solvent evaporated. Purification by precipitation (chloroform  $\rightarrow$  excess methanol) afforded the product as a yellow solid.

#### 8. Theory calculations

Density functional theory (DFT) calculations were carried out by using the Vienna ab initio simulation package (VASP)<sup>2-4</sup>. Projector-augmented wave (PAW) pseudopotentials<sup>5, 6</sup> were adopted with an energy cutoff of 450 eV. The generalized

gradient approximation with the function of Perdew–Burke–Ernzerhof (GGA-PBE)<sup>7</sup> was applied to describe the exchange-correlation function. The convergence criterion of the residual Hellmann-Feynman force and energy during structure optimization were set to 0.02 eV Å<sup>-1</sup> and 10<sup>-5</sup> eV, respectively. The Brillouin zone was built with the 2×2×1 Monkhorst-Pack grid k-points for all models in the structural optimization and Denser k-point meshes (4×4×1) were used for density of states (DOS) calculations. The vacuum space of 20 Å was adopted above the surfaces to avoid periodic interactions. The impact of van der Waals interactions was evaluated using the DFT-D2 semi-empirical force field method<sup>8</sup>.

The adsorption energy of Pd/Cu-H is calculated as follows:

$$E_a = E_{Pd/Cu-H} - E_{Pd/Cu} - n/2 E_{H_2}$$

Where  $E_{Pd/Cu-H}$  is the energy of the whole system,  $E_{Pd/Cu}$  is the energy of Pd/Cu structure, and  $E_{H_2}$  is the energy of H<sub>2</sub> molecule.

The Gibbs free energy is given as follow:

$$\Delta G = \Delta E + \Delta E_{ZPE} - T\Delta S$$

where  $\Delta E$ ,  $\Delta E_{ZPE}$  and  $T\Delta S$  denote total energy from DFT calculations, zero-point energy and entropic contributions (at 298 K), respectively.

## 9. Techno-economic analysis (TEA)

To evaluate the economic potential of the BHMF electrosynthesis by the proposed HMFRR process, a TEA was performed based on the recently reported model.

Assumptions:

- (1) The electrolyzer cost, anticipated service life of the electrolyzer, electricity cost and working time were 920 \$ m<sup>-2</sup>, 20 years, and 350 day per year, respectively. <sup>9</sup>
- (2) The electricity price was considered to be 0.03 \$ kWh<sup>-1</sup>. <sup>10</sup>
- (3) The balance of plant factor and maintenance factor were 0.35 and 0.025, respectively. <sup>9</sup>
- (4) Separation equipment: Evaporator \*2: 700000 \$; Vacuum filter: 7000 \$; Dryer \*2: 24000 \$; Condenser: 36000 \$. <sup>11</sup>
- (5) The maintenance factor were 2 in the KHCO<sub>3</sub> system.
- (6) HMF price: 217.24 \$ kg<sup>-1</sup>; BHMF price: 1336.91 \$ kg<sup>-1</sup>; O<sub>2</sub> price: 0.05 \$ kg<sup>-1</sup>. <sup>12</sup>
- (7) The daily productivity of BHMF was assumed to be 1000 kg day<sup>-1</sup>.

Calculation processes:

(1) The KHCO<sub>3</sub> system:

- 1) The base case scenario based on the flow cell experiments in 0.5 M KHCO<sub>3</sub> system: FE<sub>BHMF</sub> of 91%, productivity<sub>BHMF</sub> of 250 μmol cm<sup>-2</sup> h<sup>-1</sup>, current density of 2.4 mA cm<sup>-2</sup>, and cell voltage of -2.4 V.
- 2) After calculation, it can be seen that for every 1 kg of BHMF produced, the mass of HMF consumed were 1.16 kg. The FE of the cathode OER was assumed to be 100% and the mass of O<sub>2</sub> produced was 0.15 kg.
- 3) The energy consumption was calculated as:

*Energy consumption*

$$= 1000 \frac{kg}{day} \times \frac{mol}{128.13g} \times 2e^- \times 96485 \frac{C}{mol} \times \frac{1}{91\%} \times \frac{h}{3600s} \times 2.4V$$

$$\approx 1103.33 \frac{kWh}{day}$$

- 4) The required total current was calculated as:

$$Total\ current = 1103.33 \frac{kWh}{day} \times \frac{1000W}{kW} \times \frac{day}{24h} \times \frac{1}{2.4V} \approx 19155.03A$$

- 5) The needed electrolyzer area was calculated as:

$$Electrolyzer\ area = 19155.03A \times \frac{cm^2}{2.4mA} \times \frac{1000mA}{A} \times \frac{m^2}{10000cm^2} \approx 798.13m^2$$

- 6) Capital costs:

- i. Electrolyzer:

*Electrolyzer cost*

$$= 798.13m^2 \times 920 \frac{\$}{m^2} \times \frac{1}{20year} \times \frac{year}{350day} \times \frac{day}{ton_{BHMF}} \approx 104.90$$

- ii. Separation equipment:

*Separation equipment cost*

$$= (700000\$ + 7000\$ + 24000\$ + 36000\$) \times \frac{1}{20year} \times \frac{year}{350day}$$

$$\times \frac{day}{ton_{BHMF}} \approx 109.57 \$ ton_{BHMF}^{-1}$$

- iii. Balance of plant:

$$Balance\ of\ plant\ cost = (104.90 + 109.57) \$ ton_{BHMF}^{-1} \times 0.35 \approx 75.06\$ ton_{BHMF}^{-1}$$

- 7) Operating costs:

- i. Electricity:

$$Electricity = 1103.33 \frac{kWh}{day} \times 0.03 \frac{\$}{kWh} \times \frac{day}{ton_{BHMF}} \approx 33.10 \$ ton_{BHMF}^{-1}$$

ii. Separation:

$$Separation = 33.10 \$ ton_{BHMF}^{-1} \times 2 \approx 66.20 \$ ton_{BHMF}^{-1}$$

iii. Maintenance of electrolyzer:

$$798.13 m^2 \times 920 \frac{\$}{m^2} \times 0.025 \times \frac{year}{350 day} \times \frac{day}{ton_{BHMF}} \approx 52.45 \$ ton_{BHMF}^{-1}$$

iv. Maintenance of separation equipment:

$$157.35 \frac{\$}{ton_{BHMF}} \times \frac{ton_{BHMF}}{day} \times \frac{365 day}{year} \times 20 year \times 0.025 \times \frac{year}{350 day} \times \frac{day}{ton_{BHMF}} \approx 82.05 \$ ton_{BHMF}^{-1}$$

8) Material costs:

HMF:

$$1.16 \frac{kg_{HMF}}{kg_{BHMF}} \times 217.24 \frac{\$}{kg_{HMF}} \times \frac{1000 kg_{BHMF}}{ton_{BHMF}} \approx 251998.40 \$ ton_{BHMF}^{-1}$$

9) Catalyst and membrane replacement cost. The electrolyzer uses Platinised titanium felts as the anode and 3% Pd-Cu@3DC as the cathode. The cost of Pd is significantly higher at \$37 per gram, compared to Cu, which cost \$0.006 per gram. Therefore, Pd cost dominates the overall catalyst cost. For this analysis, we considered a catalyst loading of 2 mg cm<sup>-2</sup>, which is the typical cathode loading for this work. This results in a catalyst unit area cost of \$46 m<sup>-2</sup>. The cost of the membrane is estimated to be \$180 m<sup>-2</sup>, based on a previous study.<sup>13</sup>

$$Catalyst and membrane cost = \frac{226 \frac{\$}{m^2} \times 798.13 m^2}{350 \frac{day}{year} \times 1 \frac{ton_{BHMF}}{day} \times 5 year} \approx 103.07 \$ ton_{BHMF}^{-1}$$

10) Total cost:

*Total cost*

$$= (104.90 + 109.57 + 75.06 + 33.10 + 66.20 + 52.45 + 82.05 + 103.07) \$ \text{ton}_{BHMF}^{-1} \approx 252624.80 \$ \text{ton}_{BHMF}^{-1}$$

11) Revenue (except BHMF):

$$\text{O}_2: 0.15 \frac{kg_{O_2}}{kg_{BHMF}} \times 0.05 \frac{\$}{kg_{O_2}} \times \frac{1000 kg_{BHMF}}{\text{ton}_{BHMF}} \approx 7.5 \$ \text{ton}_{BHMF}^{-1}$$

12) BHMF levelized cost:

$$BHMF \text{ levelized cost} = (252624.80 - 7.5) \$ \text{ton}_{BHMF}^{-1} \approx 252617.30 \$ \text{ton}_{BHMF}^{-1}$$

Calculation of Net Present Value

Assumptions:

- i. . 38.9% Income tax
- ii. 10% Nominal Interest Rate<sup>9</sup>

In year zero, the facility is built, hence the cumulative present value:

*Year 0 cumulative value*

$$\begin{aligned} &= - \text{Fixed Capital Investment} - (\text{Working Capital} + \text{Startup}) \\ &= - \left( 798.13 m^2 \times 920 \frac{\$}{m^2} \right) - (355940\$ + 40000\$) \\ &\quad - \left( \left( 798.13 m^2 \times 920 \frac{\$}{m^2} \right) + (700000\$ + 7000\$ + 24000\$ + 36000\$) \right) \\ &\quad \times 0.35 - \left( 1103.33 \frac{kWh}{day} \times 0.05 \frac{\$}{kWh} \right) - \left( 1103.33 \frac{kWh}{day} \times 0.05 \frac{\$}{kWh} \right) \\ &\quad \times 2 - \left( 226 \frac{\$}{m^2} \times 798.13 m^2 \right) \approx -2207270.34 \$ \end{aligned}$$

*Year 1 depreciation*

$$\begin{aligned} &= \text{Fixed Capital Investment} \times \text{depreciation rate} = \left( 798.13 m^2 \times 920 \frac{\$}{m^2} \right) \\ &\quad \times 1.35 \times 0.05 \approx 101336.37\$ \end{aligned}$$

*Yearly profit*

$$\begin{aligned} &= (\text{Product income} - \text{operating cost}) \times 350 \text{ days} = (1336.9 \text{ ton}_{BHMF}^{-1} \\ &\quad \times 350 \text{ days} \approx 75355420 \$ \text{year}^{-1} \end{aligned}$$

*Year 1 net earnings*

$$\begin{aligned} &= (\text{Net Profit} - \text{Year 1 depreciation}) \times (1 - \text{Income tax}) = \\ &\quad (75355420\$ - 101336.37\$) \times (1 - 0.389) \approx 45980245.10 \$ \end{aligned}$$



$$\begin{aligned}
&\text{Year 1 discounted cash flow} \\
&= \text{Year 1 net Earnings} + \text{Year 1 depreciation} = 45980245.10 \$ \\
&+ 101336.37\$ \approx 46081581.50\$
\end{aligned}$$

$$\begin{aligned}
\text{Year 1 cash flow} &= \text{Year 1 discounted cash flow} \times \frac{1}{(1 + \text{Interest Rate})^{time}} \\
&= 46081581.50\$ \times \frac{1}{(1 + 0.1)^1} = 41892346.80\$
\end{aligned}$$

$$\begin{aligned}
&\text{Year 1 cumulative present value} \\
&= \text{Year 0 cumulative value} + \text{Year 1 cash flow} \\
&= -2207270.34 \$ + 41892346.80\$ \approx 39685076.40\$
\end{aligned}$$

#### 10. In situ ATR-SEIRAS tests

In situ ATR-SEIRAS tests were performed on PerkinElmer Spectrum 3 provided by Hefei in situ technology Co., Ltd. China. Au-coated Si pillar with 3%Pd-Cu@3DC catalysts coating was as working electrode, while a platinum wire and an Ag/AgCl were used as the counter and reference electrodes, respectively. The potential was applied to the working electrode ranged from -0.7 to -1.7 V. At the same time, infrared spectra were acquired within the wave number range of 4000-1000 at a spectral resolution of 4 cm<sup>-1</sup>.

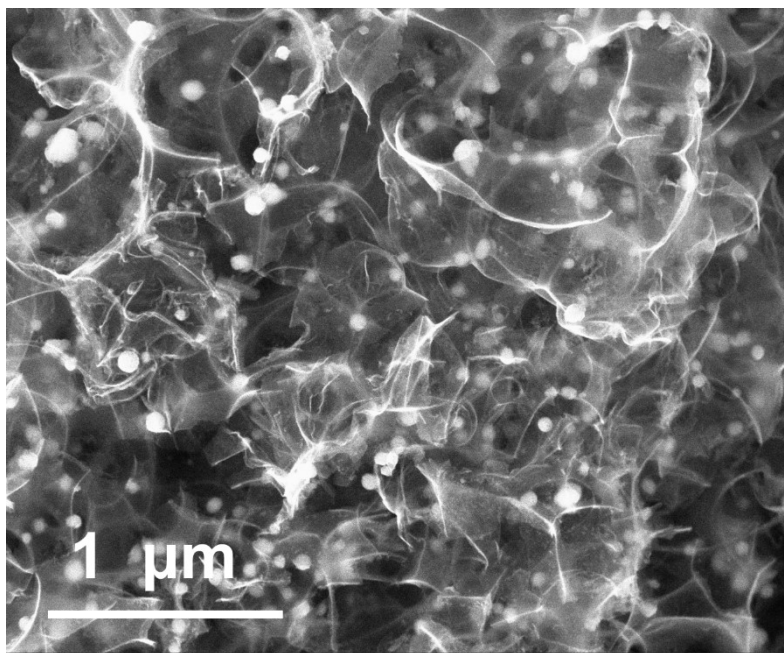

Figure S1 SEM image of 3%Pd-Cu@3DC

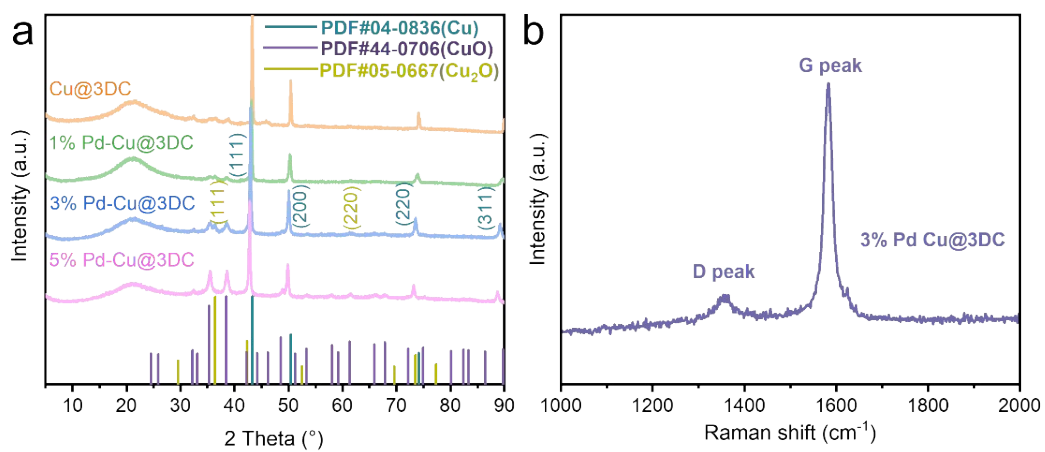

Figure S2 (a) XRD and (b) Raman patterns of the samples

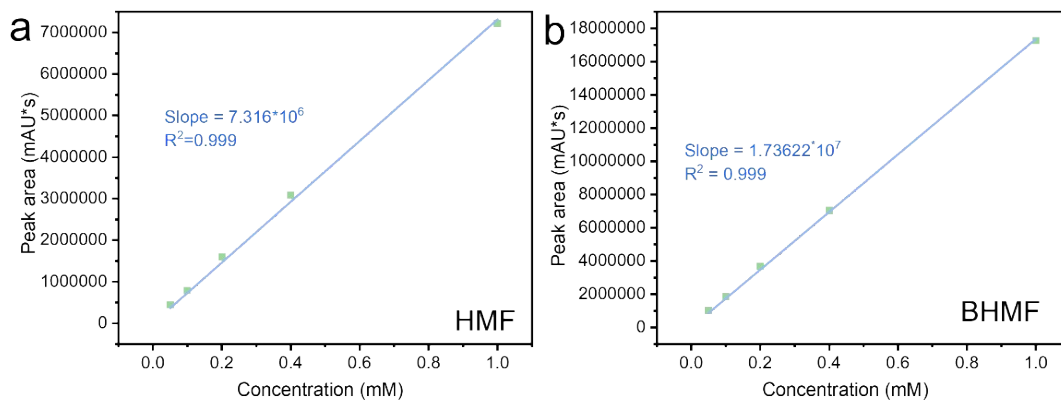

Figure S3 HPLC analysis standard curves of (a) HMF and (b)BHMF

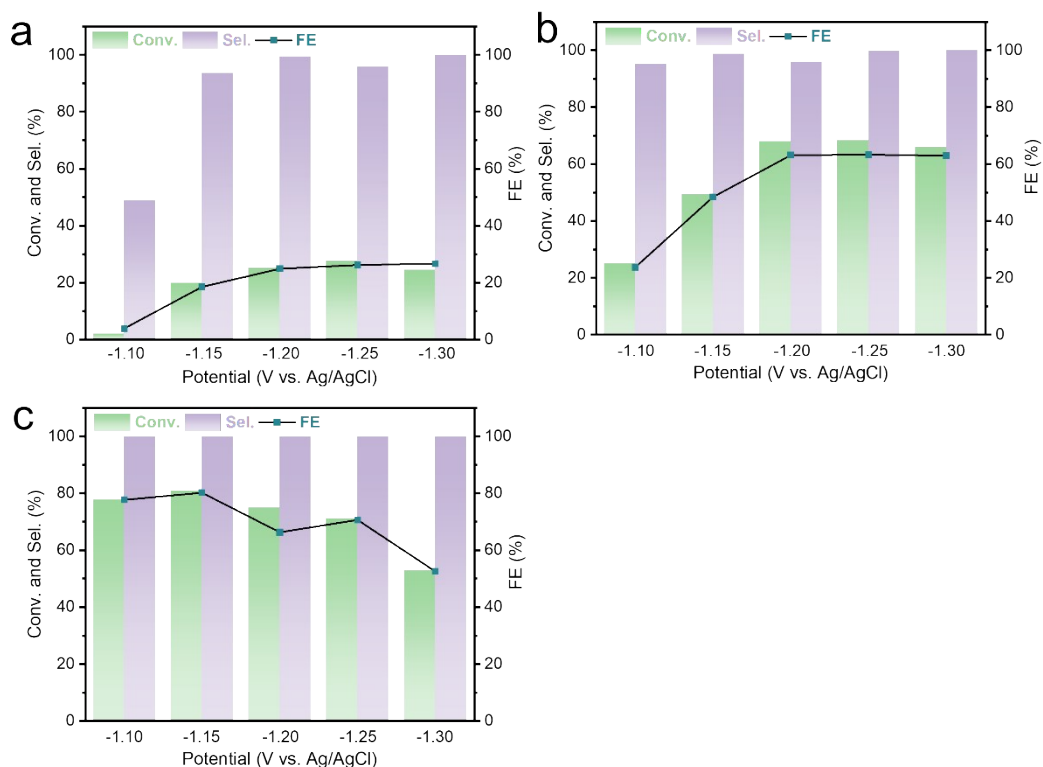

Figure S4 Potential-dependent activity profiles of (a) Cu@3DC, (b) 1%Pd-Cu@3DC, (c) 5%Pd-Cu@3DC

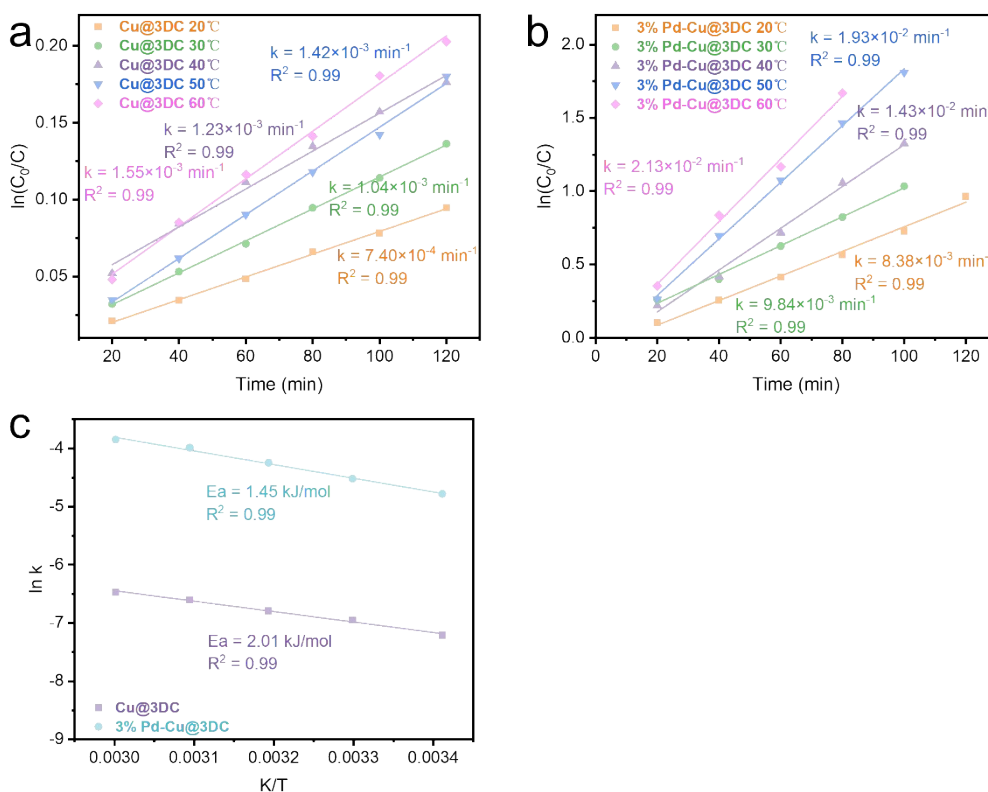

Figure S5  $\ln(C_0/C) \sim t$  plots at different temperatures for (a) Cu@3DC and (b) 3%Pd-Cu@3DC. (c) Arrhenius plots.

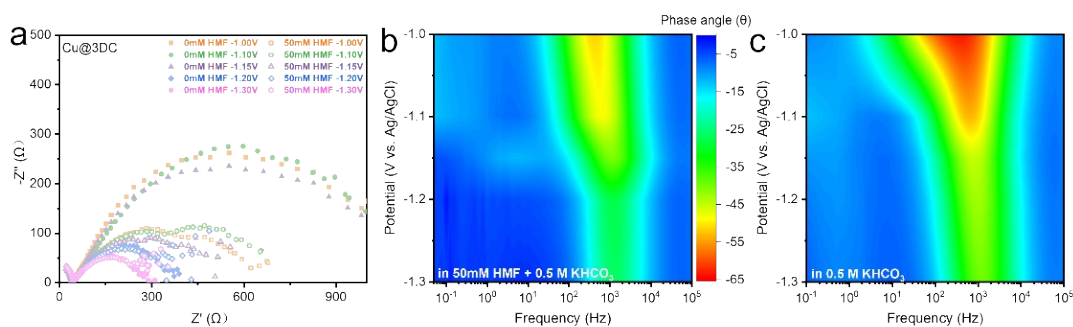

Figure S6 EIS characterization of Cu@3DC, (d) Nyquist and (e-f) Bode plots.

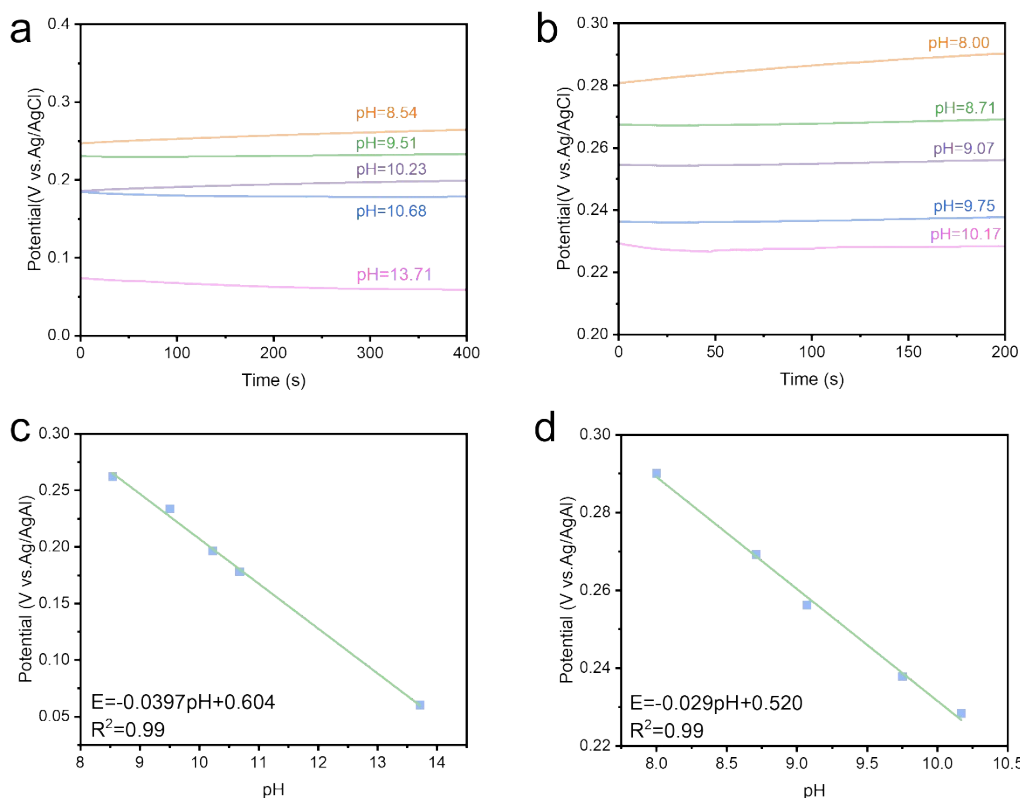

Figure S7 pH measurements at electrode surface of 3%Pd-Cu@3DC and Cu@3DC.

(a-b) Open circuit potential (OCP) of 3%Pd-Cu@3DC and Cu@3DC electrode at different pH values. (c-d) Derived standard curve of OCP vs solution pH.

The measurements were performed in 0.5 M  $\text{KHCO}_3$ . The pH values of the solution were adjusted by adding KOH. Measurements of pH on the electrode surface of (a) 3%Pd-Cu@3DC and (d) Cu@3DC with loading mass of  $0.16 \text{ mg cm}^{-2}$  at increased anodic potentials. Pt foil was used as the counter electrode, and Ag/AgCl was used as the reference electrode.

Test conditions: in 0.5 M  $\text{KHCO}_3$  with the working electrode rotating at a speed of 1600 rpm and scan rate of  $1 \text{ mV s}^{-1}$ .

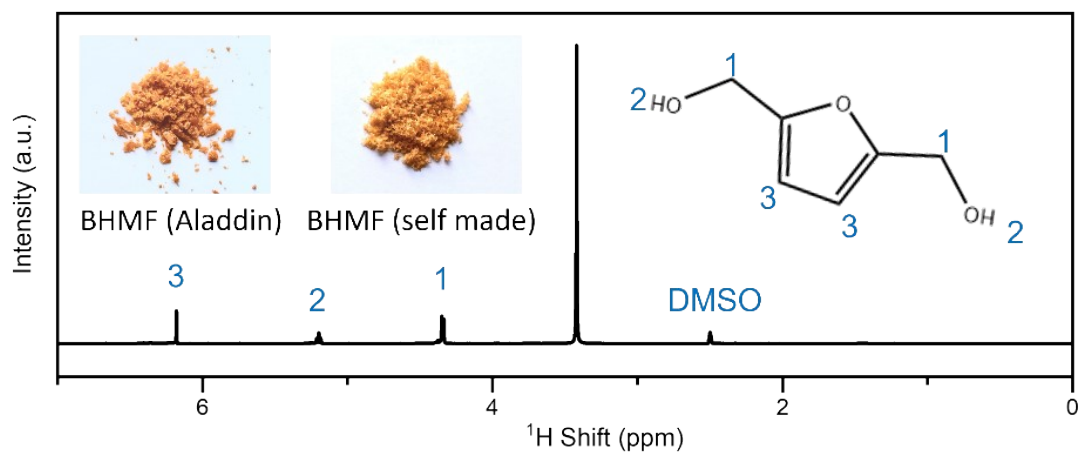

Figure S8  $^1\text{H}$  NMR analysis of BHMf. (Insert: BHMf photograph)

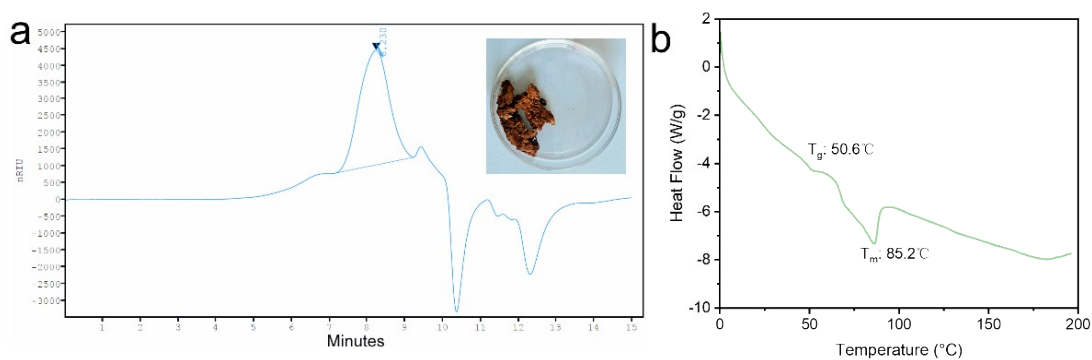

Figure S9 (a) GPC and (b) DSC characterization of PFS

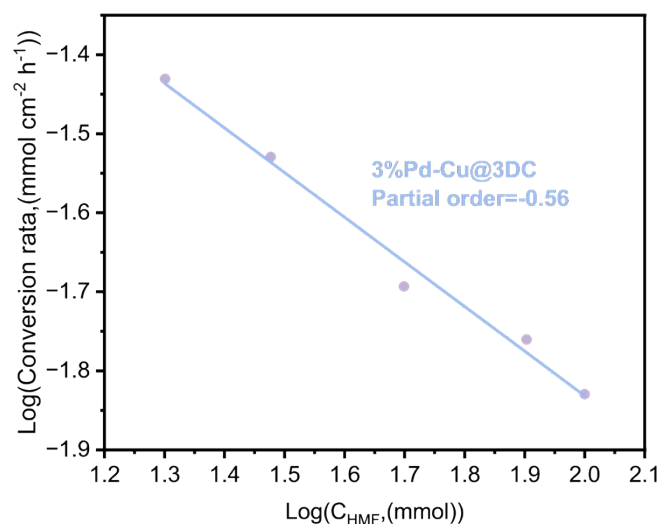

Figure S10. The conversion rate for the electrochemical reduction of HMF over 3%Pd-Cu@3DC as a function of HMF content in the 0.5 M  $\text{KHCO}_3$  solution. Reaction condition:  $-1.15$  V (vs. Ag/AgCl), all tests control the conversion of HMF

<15%, error bars represented three independent tests.

Note: As shown in our work, competitive adsorption between HMF and H<sub>2</sub>O is involved in the 3%Pd-Cu@3DC. According to the Lopez-Ruiz's work,<sup>14</sup> the rate expression for Langmuir–Hinshelwood (L-H) competitive adsorption follows as:

$$r_{LH} = \frac{k_T \times K_{sub} \times [sub] \times (K_{H^+} \times a_{H_3O^+})^2}{(1 + K_{sub} \times [sub] + K_{H^+} \times a_{H_3O^+})^3} \quad (S1)$$

Wherein,  $k_T$  is the kinetic constant of the hydrogenation step,  $K_{sub}$  is the adsorption equilibrium constant of the sub,  $[sub]$  is the concentration of substrate,  $K_{H^+}$  is the adsorption equilibrium constant of H<sub>3</sub>O<sup>+</sup>, and  $a_{H_3O^+}$  is the activity of H<sub>3</sub>O<sup>+</sup>.

The expression in our cases could follow:

$$r_{LH} = \frac{k_T \times K_{HMF} \times [HMF] \times (K_{H_2O} \times a_{H_2O})^2}{(1 + K_{HMF} \times [HMF] + K_{H_2O} \times a_{H_2O})^3} \quad (S2)$$

$k_T$  is the kinetic constant of the hydrogenation step,  $K_{HMF}$  is the adsorption equilibrium constant of sub,  $[HMF]$  is the concentration of substrate,  $K_{H_2O}$  is the adsorption equilibrium constant of H<sub>2</sub>O, and  $a_{H_2O}$  is the activity of H<sub>2</sub>O.

With the increased HMF bulk concentration,  $K_{HMF} \times [HMF] > 1$  and the expression could be simplified as:

$$r_{LH} = \frac{k_T \times (K_{H_2O} \times a_{H_2O})^2}{(K_{HMF} \times [HMF])^2} \quad (S3)$$

Accordingly, equation S3 reflects the L-H mechanism with competitive adsorption between HMF and H<sub>2</sub>O, which predicts a negative order with an elevation of HMF concentration.

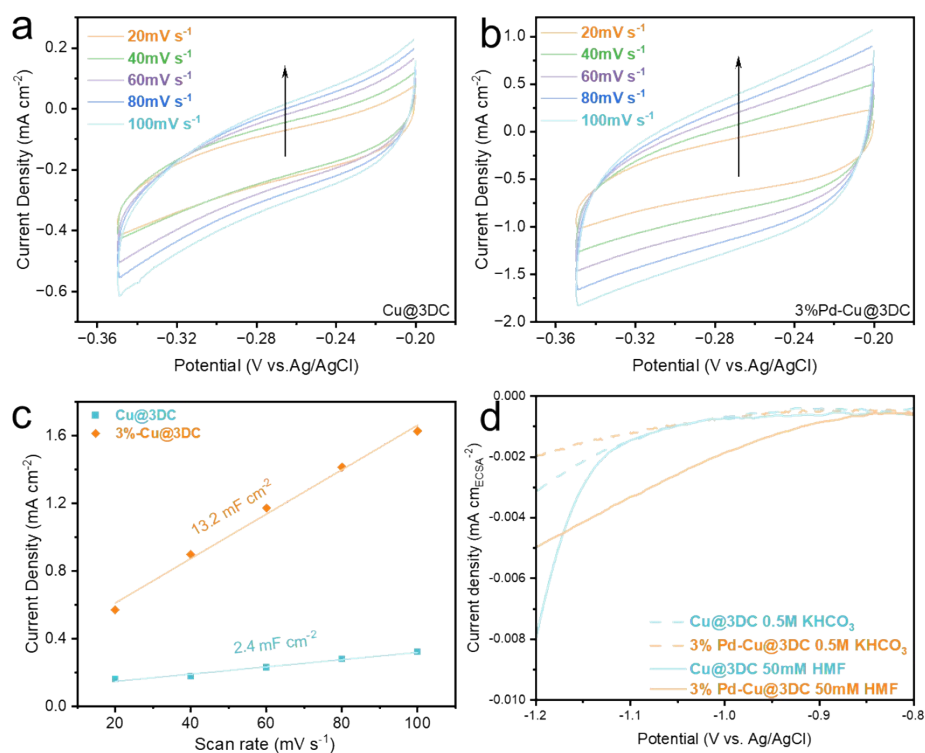

Figure S11. Cyclic voltammograms (CVs) of (a) Cu@3DC and (b) 3%Pd- Cu@3DC. (c)  $C_{dl}$  curves. (d) LSV curves of the current density normalized by ECSA.

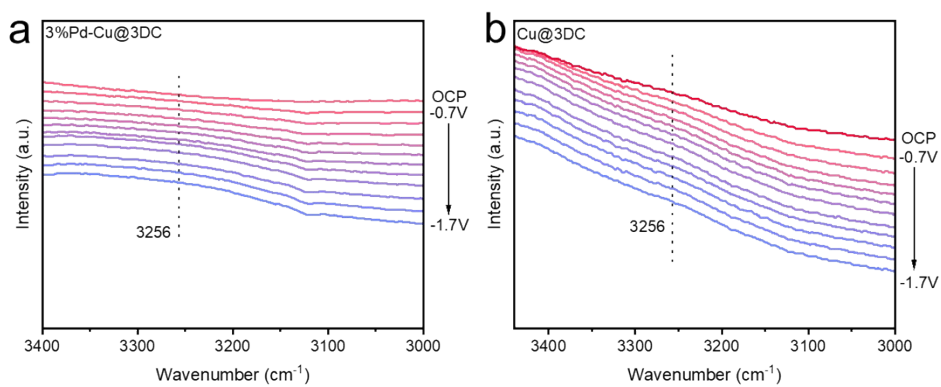

Figure S12 In situ ATR-SEIRAS spectroscopy recorded on (a) 3%Pd-Cu@3DC and (b) Cu@3DC.

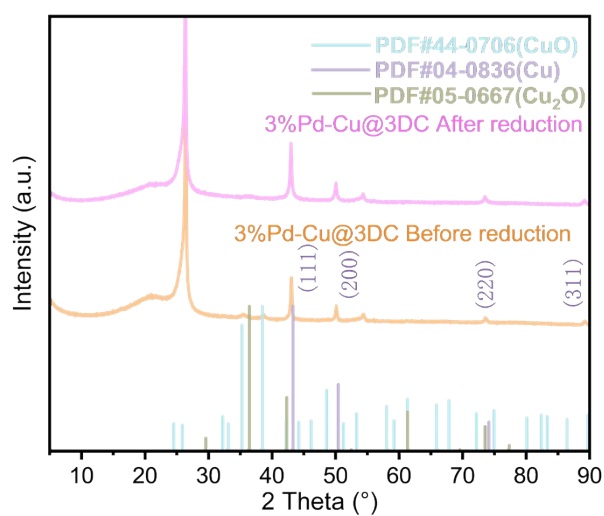

Figure S13 XRD patterns of 3% Pd-Cu@3DC before and after reduction.

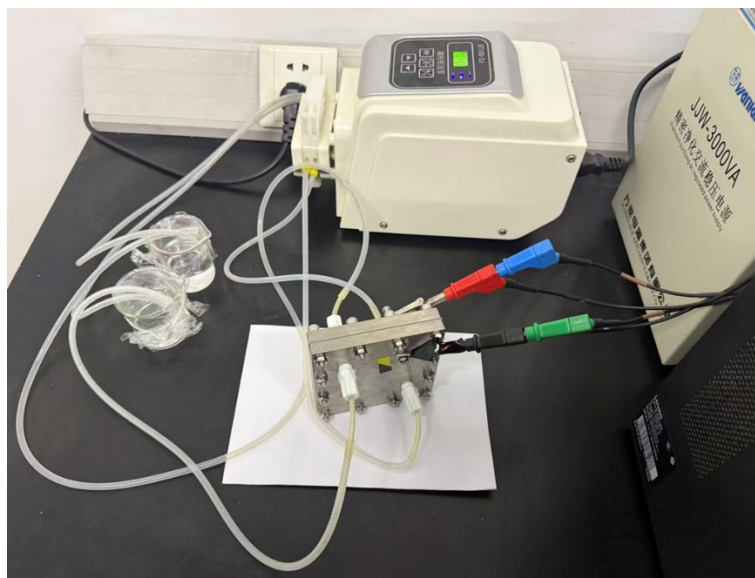

Figure S14 Photograph of the PEM flow reactor for the continuous electroreduction of HMF to BHMF



Table S1 Performance comparison with catalyst in literature

| Catalyst                            | Con. | Sel.  | FE  | Total<br>cycle time | BHMF<br>Yield (%) | Ref.                           |
|-------------------------------------|------|-------|-----|---------------------|-------------------|--------------------------------|
| Pt-Cu                               | --   | 94%   | 90% | 10h                 | --                | 10.1016/j.jechem.2025.02.010   |
| Ru <sub>1</sub> Cu SAA              | 87%  | 97%   | 85% | 4h                  | 84                | 10.1002/ange.202209849         |
| Cu(OH) <sub>2</sub> ER/CF           | 92%  | 90%   | 92% | 10h                 | 83                | 10.1016/j.jechem.2023.05.003   |
| Ag <sub>1</sub> Cu <sub>1</sub> /PA | 93%  | 94%   | 62% | 12h                 | 87                | 10.1016/j.ijhydene.2022.06.211 |
| CuFeO <sub>x</sub> /CF              | 90%  | 93%   | 98% | 15h                 | 90                | 10.1002/cssc.202401278         |
| Pd Nps/XC-72                        | --   | 90%   | 50% | 8 cycles            | --                | 10.1002/adma.202307799         |
| RhCu-CTAB                           | 75%  | ~100% | 74% | 26h                 | 75                | 10.1002/anie.202407121         |
| 3%Pd-Cu@3DC                         | 97%  | 99%   | 97% | 31h                 | 96                | <b>This work</b>               |

Table S2 GPC test results of PFS

| sample | M <sub>n</sub> | M <sub>v</sub> | M <sub>z</sub> | M <sub>z+1</sub> | polydispersity |
|--------|----------------|----------------|----------------|------------------|----------------|
| PFS    | 10861          | 19364          | 31992          | 46475            | 1.782893       |

## Reference

1. Zeng, C.; Seino, H.; Ren, J.; Hatanaka, K.; Yoshie, N., Bio-Based Furan Polymers with Self-Healing Ability. *Macromolecules* **2013**, *46* (5), 1794-1802.
2. Blöchl, P. E., Projector augmented-wave method. *Physical Review B* 1994, *50* (24), 17953-17979.
3. Kresse, G.; Joubert, D., From ultrasoft pseudopotentials to the projector augmented-wave method. *Physical Review B* 1999, *59* (3), 1758-1775.
4. Perdew, J. P.; Burke, K.; Ernzerhof, M., Generalized Gradient Approximation Made Simple. *Physical Review Letters* 1996, *77* (18), 3865-3868.
5. Kresse, G.; Hafner, J., Ab initio molecular dynamics for open-shell transition metals. *Physical Review B* 1993, *48* (17), 13115-13118.
6. Kresse, G.; Furthmüller, J. J. P. R. B., Electronic-structure-based chemical descriptors:(In) dependence on self-interaction and Hartree-Fock exchange. *Physical Review B* 1996, *54*, 11169-11186.
7. Kresse, G.; Furthmüller, J. J. J. C. M. S., Generalized gradient approximation made simple. *Physical Review Letters* 1996, *6*, 15-50.
8. Grimme S., *Journal of Computational Chemistry*. 2006, *27*(15):1787-99.
9. Patel, P.; Schwartz, D.; Wang, X.; Lin, R.; Ajao, O.; Seifitokaldani, A., Technoeconomic and Life-Cycle Assessment for Electrocatalytic Production of Furandicarboxylic Acid. *ACS Sustainable Chemistry & Engineering* 2022, *10* (13), 4206-4217.
10. Zhao, B.-H.; Chen, F.; Wang, M.; Cheng, C.; Wu, Y.; Liu, C.; Yu, Y.; Zhang, B., *Nature Sustainability* 2023, *6*(7): 827-837.
11. Appendix D: Capital Cost Guidelines. In *Rules of Thumb in Engineering Practice*, 2007; pp 376-436.
12. Nabil, S. K.; Muzibur Raghuman, M. A.; Kannimuthu, K.; Rashid, M.; Shiran, H. S.; Kibria, M. G.; Khan, M. A., Acid–base chemistry and the economic implication of electrocatalytic carboxylate production in alkaline

electrolytes. *Nature Catalysis* 2024, 7 (3), 330-337.

13. U.S. Geological Survey, 2020, Mineral commodity summaries 2020: U.S. Geological Survey, 200 p, <https://doi.org/10.3133/mcs2020>

14. Lopez-Ruiz, J. A.; Sanyal, U.; Egbert, J.; Gutiérrez, O. Y.; Holladay, J. Kinetic Investigation of the Sustainable Electrocatalytic Hydrogenation of Benzaldehyde on Pd/C: Effect of Electrolyte Composition and Half-Cell Potentials. *ACS Sustainable Chemistry & Engineering* 2018, 6 (12), 16073–16085. DOI: 10.1021/acssuschemeng.8b02637.
